# Supplementary material for: An altered gene expression profile in tyramine-exposed intestinal cell cultures supports the genotoxicity of this biogenic amine at dietary concentrations
Source: PubMed Central journal article supplement (PMC6242974; doi:10.1038/s41598-018-35125-9), 2018-11-19
Supplement: 41598_2018_35125_MOESM1_ESM.pdf [file 41598_2018_35125_MOESM1_ESM.pdf]

1 **Supplementary information**

2

3 **An altered gene expression profile in tyramine-exposed intestinal cell**  
 4 **cultures supports the genotoxicity of this biogenic amine at dietary**  
 5 **concentrations**

6

7 Beatriz del Rio, Begoña Redruello, Victor Ladero, Santiago Cal, Alvaro Obaya and  
 8 Miguel A. Alvarez

9

10 **Table 1S.** Gene expression analysis of tyramine-, histamine- and putrescine-  
 11 exposed HT29 cells compared to untreated HT29 cells using the RT<sup>2</sup> Profiler™ PCR  
 12 Arrays Human Cancer Pathway Finder array (PAHS-033ZC, Qiagen).

13

14

| Gene symbol         | Description                                                         | Tma/Control |         | Hma/Control |         | Put/Control |         |
|---------------------|---------------------------------------------------------------------|-------------|---------|-------------|---------|-------------|---------|
|                     |                                                                     | Fold change | p-value | Fold change | p-value | Fold change | p-value |
| <b>Angiogenesis</b> |                                                                     |             |         |             |         |             |         |
| ANGPT1              | Angiopoietin 1                                                      | -1.88       | 0.1243  | -1.49       | 0.3312  | -1.930      | 0.0922  |
| ANGPT2              | Angiopoietin 2                                                      | -1.58       | 0.2391  | 2.91        | 0.0536  | 2.160       | 0.1380  |
| CCL2                | Chemokine (C-C motif) ligand 2                                      | 1.37        | 0.2061  | 1.14        | 0.5710  | -1.040      | 0.7618  |
| FGF2                | Fibroblast growth factor 2 (basic)                                  | -1.64       | 0.0249  | 1.13        | 0.5383  | -1.390      | 0.4600  |
| FLT1                | Fms-related tyrosine kinase 1                                       | 1.37        | 0.2061  | -1.08       | 0.8743  | -1.040      | 0.7618  |
| KDR                 | Kinase insert domain receptor (a type III receptor tyrosine kinase) | 1.37        | 0.2061  | -1.08       | 0.8743  | -1.040      | 0.7618  |
| PGF                 | Placental growth factor                                             | 4.87        | 0.0672  | 1.96        | 0.1298  | -1.210      | 0.5668  |
| SERPINF1            | Serpin peptidase inhibitor, clade F, member 1                       | -2.22       | 0.0698  | 1.25        | 0.4446  | 1.420       | 0.2546  |
| TEK                 | TEK tyrosine kinase, endothelial                                    | -4.90       | 0.0574  | -2.12       | 0.2231  | -1.560      | 0.2521  |
| VEGFC               | Vascular endothelial growth factor C                                | 1.37        | 0.2061  | -1.08       | 0.8743  | -1.040      | 0.7618  |
| <b>Apoptosis</b>    |                                                                     |             |         |             |         |             |         |
| APAF1               | Apoptotic peptidase activating factor 1                             | 1.41        | 0.5716  | 1.30        | 0.6237  | 1.390       | 0.5301  |
| BCL2L11             | BCL2-like 11 (apoptosis facilitator)                                | 2.70        | 0.1541  | 1.19        | 0.5451  | 1.040       | 0.9924  |
| BIRC3               | Baculoviral IAP repeat containing 3                                 | -2.31       | 0.1213  | -1.22       | 0.7010  | -1.150      | 0.9962  |
| CASP2               | Caspase 2, apoptosis-related cysteine peptidase                     | -1.27       | 0.5067  | -1.08       | 0.8029  | -1.310      | 0.5039  |
| CASP7               | Caspase 7, apoptosis-related cysteine peptidase                     | -2.62       | 0.0356  | -1.31       | 0.2277  | -1.060      | 0.8923  |

|                                                   |                                                                                       |       |        |       |        |        |        |
|---------------------------------------------------|---------------------------------------------------------------------------------------|-------|--------|-------|--------|--------|--------|
| CASP9                                             | Caspase 9, apoptosis-related cysteine peptidase                                       | -1.57 | 0.2327 | -1.04 | 0.8403 | -1.220 | 0.2304 |
| CFLAR                                             | CASP8 and FADD-like apoptosis regulator                                               | 1.04  | 0.7391 | -1.40 | 0.0469 | -1.460 | 0.0635 |
| FASLG                                             | Fas ligand (TNF superfamily, member 6)                                                | 1.37  | 0.2061 | -1.08 | 0.8743 | -1.040 | 0.7618 |
| NOL3                                              | Nucleolar protein 3 (apoptosis repressor with CARD domain)                            | -2.27 | 0.1475 | -1.18 | 0.6041 | -1.250 | 0.3566 |
| XIAP                                              | X-linked inhibitor of apoptosis                                                       | -1.79 | 0.0798 | 1.00  | 0.9677 | 1.070  | 0.5874 |
| <b>Cell Cycle</b>                                 |                                                                                       |       |        |       |        |        |        |
| AURKA                                             | Aurora kinase A                                                                       | -2.57 | 0.0493 | -1.26 | 0.3667 | -1.320 | 0.4206 |
| CCND2                                             | Cyclin D2                                                                             | 1.39  | 0.1694 | -1.08 | 0.8743 | -1.040 | 0.7618 |
| CCND3                                             | Cyclin D3                                                                             | 1.12  | 0.8521 | -1.28 | 0.5541 | -1.320 | 0.4865 |
| CDC20                                             | Cell division cycle 20 homologue ( <i>S. cerevisiae</i> )                             | -1.50 | 0.0750 | -1.17 | 0.3774 | -1.200 | 0.6298 |
| E2F4                                              | E2F transcription factor 4, p107/p130-binding                                         | -1.46 | 0.0274 | -1.36 | 0.0250 | -1.320 | 0.0698 |
| MCM2                                              | Minichromosome maintenance complex component 2                                        | -3.29 | 0.1065 | -2.18 | 0.2231 | -1.730 | 0.4511 |
| MKI67                                             | Antigen identified by monoclonal antibody Ki-67                                       | -1.51 | 0.3500 | -1.05 | 0.7903 | -1.340 | 0.5063 |
| SKP2                                              | S-phase kinase-associated protein 2 (p45)                                             | -4.04 | 0.0599 | -1.67 | 0.2235 | -1.560 | 0.2710 |
| STMN1                                             | Stathmin 1                                                                            | 1.26  | 0.4939 | -1.03 | 0.9435 | -1.180 | 0.7388 |
| WEE1                                              | WEE1 homologue ( <i>S. pombe</i> )                                                    | 1.22  | 0.5274 | -1.45 | 0.4050 | -1.320 | 0.5944 |
| <b>Cellular Senescence</b>                        |                                                                                       |       |        |       |        |        |        |
| BMI1                                              | BMI1 polycomb ring finger oncogene                                                    | -7.68 | 0.4092 | 1.11  | 0.4282 | -1.050 | 0.5428 |
| ETS2                                              | V-Ets erythroblastosis virus E26 oncogene homologue 2 (avian)                         | -3.15 | 0.0291 | -1.11 | 0.6217 | -1.080 | 0.6165 |
| IGFBP3                                            | Insulin-like growth factor binding protein 3                                          | 1.37  | 0.2061 | -1.08 | 0.8743 | -1.040 | 0.7618 |
| IGFBP5                                            | Insulin-like growth factor binding protein 5                                          | 1.37  | 0.2061 | -1.08 | 0.8743 | -1.040 | 0.7618 |
| IGFBP7                                            | Insulin-like growth factor binding protein 7                                          | 1.05  | 0.9042 | 1.18  | 0.7192 | 1.470  | 0.3433 |
| MAP2K1                                            | Mitogen-activated protein kinase 1                                                    | -1.21 | 0.3543 | 1.02  | 0.9950 | -1.050 | 0.7217 |
| MAP2K3                                            | Mitogen-activated protein kinase 3                                                    | 1.03  | 0.9574 | -1.10 | 0.8726 | -1.410 | 0.4034 |
| MAPK14                                            | Mitogen-activated protein kinase 14                                                   | 1.01  | 0.8941 | -1.07 | 0.6595 | 1.030  | 0.8589 |
| SERPINB2                                          | Serpin peptidase inhibitor, clade B (ovalbumin), member 2                             | 1.37  | 0.2061 | -1.08 | 0.8743 | -1.040 | 0.7618 |
| SOD1                                              | Superoxide dismutase 1, soluble                                                       | 1.13  | 0.1821 | -1.07 | 0.7523 | -1.120 | 0.4288 |
| TBX2                                              | T-box 2                                                                               | 1.27  | 0.3702 | -1.16 | 0.6779 | -1.120 | 0.5295 |
| <b>DNA Damage &amp; Repair</b>                    |                                                                                       |       |        |       |        |        |        |
| DDB2                                              | Damage-specific DNA binding protein 2, 48kDa                                          | 1.18  | 0.7198 | 1.09  | 0.9518 | -1.040 | 0.8413 |
| DDIT3                                             | DNA-damage-inducible transcript 3                                                     | 22.37 | 0.0924 | 3.52  | 0.1649 | 1.000  | 0.9946 |
| ERCC3                                             | Excision repair cross-complementing rodent repair deficiency, complementation group 3 | -2.80 | 0.0127 | -1.09 | 0.2256 | -1.060 | 0.7288 |
| ERCC5                                             | Excision repair cross-complementing rodent repair deficiency, complementation group 5 | -1.64 | 0.5008 | 1.01  | 0.9620 | -1.140 | 0.4275 |
| GADD45G                                           | Growth arrest and DNA-damage-inducible, gamma                                         | 6.63  | 0.0122 | 1.53  | 0.0693 | 1.260  | 0.2258 |
| LIG4                                              | Ligase IV, DNA, ATP-dependent                                                         | 1.02  | 0.8601 | 1.36  | 0.1682 | 1.060  | 0.8295 |
| POLB                                              | Polymerase (DNA directed), beta                                                       | 1.58  | 0.0228 | -1.04 | 0.7872 | -1.060 | 0.6436 |
| PPP1R15A                                          | Protein phosphatase 1, regulatory (inhibitor) subunit 15A                             | 7.98  | 0.0035 | 1.32  | 0.3660 | -1.600 | 0.0221 |
| <b>Epithelial-to-Mesenchymal Transition (EMT)</b> |                                                                                       |       |        |       |        |        |        |
| CDH2                                              | Cadherin 2, type 1, N-cadherin (neuronal)                                             | 1.37  | 0.2061 | -1.08 | 0.8743 | -1.040 | 0.7618 |
| DSP                                               | Desmoplakin                                                                           | -1.15 | 0.6654 | -1.21 | 0.3742 | -1.200 | 0.4693 |

|                                   |                                                                                                      |       |        |       |        |        |        |
|-----------------------------------|------------------------------------------------------------------------------------------------------|-------|--------|-------|--------|--------|--------|
| FOXC2                             | Forkhead box C2 (MFH-1, mesenchyme forkhead 1)                                                       | 4.25  | 0.0971 | 1.19  | 0.5013 | 1.120  | 0.6930 |
| GSC                               | Goosecoid homeobox                                                                                   | 1.37  | 0.2061 | -1.08 | 0.8743 | -1.040 | 0.7618 |
| KRT14                             | Keratin 14                                                                                           | 1.20  | 0.1650 | -1.39 | 0.2777 | -1.170 | 0.3314 |
| OCLN                              | Occludin                                                                                             | 1.90  | 0.0068 | 1.15  | 0.5294 | 1.070  | 0.7531 |
| SNAI1                             | Snail homologue 1 (Drosophila)                                                                       | 7.72  | 0.1157 | 1.07  | 0.7528 | 1.100  | 0.6270 |
| SNAI2                             | Snail homologue 2 (Drosophila)                                                                       | 1.37  | 0.2061 | -1.08 | 0.8743 | -1.040 | 0.7618 |
| SNAI3                             | Snail homologue 3 (Drosophila)                                                                       | 1.19  | 0.6680 | 1.45  | 0.3774 | 1.700  | 0.1641 |
| SOX10                             | SRY (sex determining region Y)-box 10                                                                | 1.93  | 0.1528 | -1.04 | 0.9625 | 1.240  | 0.4950 |
| <b>Hypoxia signalling</b>         |                                                                                                      |       |        |       |        |        |        |
| ADM                               | Adrenomedullin                                                                                       | 3.19  | 0.0989 | 1.10  | 0.6212 | 1.060  | 0.7108 |
| ARNT                              | Aryl hydrocarbon receptor nuclear translocator                                                       | 1.06  | 0.6516 | 1.81  | 0.0167 | 1.490  | 0.1144 |
| CA9                               | Carbonic anhydrase IX                                                                                | -1.45 | 0.0806 | 1.03  | 0.7780 | -1.110 | 0.6548 |
| EPO                               | Erythropoietin                                                                                       | 1.37  | 0.2061 | -1.07 | 0.8980 | 1.740  | 0.1819 |
| HMOX1                             | Heme oxygenase (decycling) 1                                                                         | 13.53 | 0.0519 | 1.17  | 0.8034 | 1.180  | 0.7442 |
| LDHA                              | Lactate dehydrogenase A                                                                              | -2.08 | 0.0908 | 1.07  | 0.9893 | 1.060  | 0.9719 |
| SLC2A1                            | Solute carrier family 2, member 1                                                                    | -2.24 | 0.1029 | -1.68 | 0.4578 | -1.350 | 0.6493 |
| <b>Metabolism</b>                 |                                                                                                      |       |        |       |        |        |        |
| ACLY                              | ATP citrate lyase                                                                                    | 1.37  | 0.2061 | -1.08 | 0.8743 | -1.040 | 0.7618 |
| ACSL4                             | Acyl-CoA synthetase long-chain family member 4                                                       | -1.50 | 0.1674 | 1.10  | 0.6949 | -1.050 | 0.7660 |
| ATP5A1                            | ATP synthase, H <sup>+</sup> transporting, mitochondrial F1 complex, alpha subunit 1, cardiac muscle | -1.87 | 0.0130 | -1.15 | 0.4979 | -1.090 | 0.5969 |
| COX5A                             | Cytochrome c oxidase subunit Va                                                                      | -1.18 | 0.1617 | -1.11 | 0.5265 | -1.120 | 0.4827 |
| <b>CPT2</b>                       | Carnitine palmitoyltransferase 2                                                                     | -9.09 | 0.0002 | -2.95 | 0.0017 | -2.180 | 0.0036 |
| G6PD                              | Glucose-6-phosphate dehydrogenase                                                                    | -1.24 | 0.9599 | 1.38  | 0.5701 | 1.310  | 0.6428 |
| GPD2                              | Glycerol-3-phosphate dehydrogenase 2 (mitochondrial)                                                 | -2.25 | 0.0553 | -1.62 | 0.1418 | -1.500 | 0.2296 |
| LPL                               | Lipoprotein lipase                                                                                   | 1.37  | 0.2061 | -1.08 | 0.8743 | -1.040 | 0.7618 |
| PFKL                              | Phosphofructokinase, liver                                                                           | -1.24 | 0.3087 | -1.61 | 0.1607 | -1.480 | 0.1378 |
| UQCRC1                            | Ubiquinol-cytochrome c reductase, Rieske iron-sulphur polypeptide 1                                  | -1.35 | 0.0502 | -1.09 | 0.4166 | -1.080 | 0.6013 |
| <b>Telomeres &amp; Telomerase</b> |                                                                                                      |       |        |       |        |        |        |
| DKC1                              | Dyskeratosis congenita 1, dyskerin                                                                   | -1.70 | 0.2377 | -1.17 | 0.5911 | -1.270 | 0.4944 |
| PINX1                             | PIN2/TERF1 interacting, telomerase inhibitor 1                                                       | -2.31 | 0.3755 | 1.04  | 0.8849 | -1.150 | 0.6328 |
| TEP1                              | Telomerase-associated protein 1                                                                      | -1.34 | 0.3781 | -1.35 | 0.2554 | -1.190 | 0.4046 |
| TERF1                             | Telomeric repeat binding factor (NIMA-interacting) 1                                                 | -1.52 | 0.4448 | -1.21 | 0.4676 | -1.140 | 0.5530 |
| TERF2IP                           | Telomeric repeat binding factor 2, interacting protein                                               | 2.84  | 0.1859 | -1.06 | 0.8169 | -1.270 | 0.4599 |
| TINF2                             | TERF1 (TRF1)-interacting nuclear factor 2                                                            | -1.80 | 0.0690 | -1.40 | 0.0502 | -1.150 | 0.1582 |
| TNKS                              | Tankyrase, TRF1-interacting ankyrin-related ADP-ribose polymerase                                    | -1.31 | 0.3000 | -1.40 | 0.2539 | -1.520 | 0.2922 |
| TNKS2                             | Tankyrase, TRF1-interacting ankyrin-related ADP-ribose polymerase 2                                  | -2.08 | 0.1044 | -1.14 | 0.5372 | -1.020 | 0.9441 |

Genes were sorted by Functional Gene Grouping as outlined by the RT<sup>2</sup> Profiler™ PCR Array Human Cancer PathwayFinder™ Kit. Gene expression levels highlighted in boldface were confirmed by real-time qPCR analysis. Tma: tyramine; Hma: histamine; Put: putrescine.

15  
16  
17  
18  
19

20 **Table 2S.** Gene expression of tyramine-exposed HT29 cells compared to untreated  
 21 HT29 cells using the RT<sup>2</sup> PCR Human DNA Damage Signaling Pathway array  
 22 (PAHS-029ZC, Qiagen).

23  
 24

| Gene symbol                    | Description                                                                           | Tma/Control |         |
|--------------------------------|---------------------------------------------------------------------------------------|-------------|---------|
|                                |                                                                                       | Fold change | p-value |
| <b>ATM / ATR signalling</b>    |                                                                                       |             |         |
| ATM                            | Ataxia telangiectasia mutated                                                         | -1.83       | 0.2063  |
| ATR                            | Ataxia telangiectasia and Rad3 related                                                | -2.26       | 0.0531  |
| ATRIP                          | ATR interacting protein                                                               | -2.73       | 0.0454  |
| BARD1                          | BRCA1 associated RING domain 1                                                        | -3.20       | 0.1430  |
| BRCA1                          | Breast cancer 1, early onset                                                          | -1.92       | 0.2411  |
| CDC25A                         | Cell division cycle 25 homologue A ( <i>S. pombe</i> )                                | -1.47       | 0.7119  |
| CHEK1                          | CHK1 checkpoint homologue ( <i>S. pombe</i> )                                         | -1.38       | 0.4933  |
| CHEK2                          | CHK2 checkpoint homologue ( <i>S. pombe</i> )                                         | -1.14       | 0.6314  |
| CSNK2A2                        | Casein kinase 2, alpha prime polypeptide                                              | 1.47        | 0.1013  |
| FANCD2                         | Fanconi anaemia, complementation group D2                                             | -1.33       | 0.4814  |
| H2AFX                          | H2A histone family, member X                                                          | 1.03        | 0.8531  |
| HUS1                           | HUS1 checkpoint homologue ( <i>S. pombe</i> )                                         | -1.52       | 0.1916  |
| MDC1                           | Mediator of DNA-damage checkpoint 1                                                   | -1.56       | 0.2740  |
| PARP1                          | Poly (ADP-ribose) polymerase 1                                                        | -2.22       | 0.1493  |
| RAD1                           | RAD1 homologue ( <i>S. pombe</i> )                                                    | 1.07        | 0.8671  |
| RAD17                          | RAD17 homologue ( <i>S. pombe</i> )                                                   | -1.83       | 0.0860  |
| RAD50                          | RAD50 homologue ( <i>S. cerevisiae</i> )                                              | -2.12       | 0.1005  |
| RAD9A                          | RAD9 homologue A ( <i>S. pombe</i> )                                                  | 1.10        | 0.8714  |
| RBBP8                          | Retinoblastoma binding protein 8                                                      | -1.25       | 0.5131  |
| RNF168                         | Ring finger protein 168                                                               | 1.88        | 0.0783  |
| RNF8                           | Ring finger protein 8                                                                 | 1.23        | 0.3715  |
| SMC1A                          | Structural maintenance of chromosomes 1A                                              | -1.07       | 0.6662  |
| TOPBP1                         | Topoisomerase (DNA) II binding protein 1                                              | -1.53       | 0.2681  |
| TP53                           | Tumour protein p53                                                                    | -2.38       | 0.1091  |
| <b>DNA Damage &amp; Repair</b> |                                                                                       |             |         |
| CDK7                           | Cyclin-dependent kinase 7                                                             | 1.65        | 0.0120  |
| DDB1                           | Damage-specific DNA binding protein 1, 127kDa                                         | -1.33       | 0.1018  |
| DDB2                           | Damage-specific DNA binding protein 2, 48kDa                                          | 1.18        | 0.8008  |
| ERCC1                          | Excision repair cross-complementing rodent repair deficiency, complementation group 1 | -1.34       | 0.0649  |
| ERCC2                          | Excision repair cross-complementing rodent repair deficiency, complementation group 2 | -2.44       | 0.0259  |
| LIG1                           | Ligase I, DNA, ATP-dependent                                                          | -1.89       | 0.2830  |
| NTHL1                          | Nth endonuclease III-like 1 ( <i>E. coli</i> )                                        | -1.50       | 0.1470  |
| OGG1                           | 8-oxoguanine DNA glycosylase                                                          | -1.03       | 0.8552  |

|                                         |                                                                        |       |        |
|-----------------------------------------|------------------------------------------------------------------------|-------|--------|
| PCNA                                    | Proliferating cell nuclear antigen                                     | -1.69 | 0.2164 |
| PNKP                                    | Polynucleotide kinase 3'-phosphatase                                   | -1.52 | 0.0998 |
| RPA1                                    | Replication protein A1, 70kDa                                          | -2.17 | 0.0614 |
| SIRT1                                   | Sirtuin 1                                                              | 4.42  | 0.0645 |
| TP53                                    | Tumour protein p53                                                     | -2.38 | 0.1091 |
| XPA                                     | Xeroderma pigmentosum, complementation group A                         | -2.19 | 0.0136 |
| XPC                                     | Xeroderma pigmentosum, complementation group C                         | -2.17 | 0.1902 |
| <b>Base Excision Repair (BER)</b>       |                                                                        |       |        |
| APEX1                                   | APEX nuclease (multifunctional DNA repair enzyme) 1                    | -1.22 | 0.1716 |
| FEN1                                    | Flap structure-specific endonuclease 1                                 | -1.72 | 0.1985 |
| LIG1                                    | Ligase I, DNA, ATP-dependent                                           | -1.89 | 0.2830 |
| MBD4                                    | Methyl-CpG binding domain protein 4                                    | 1.11  | 0.7889 |
| MPG                                     | N-methylpurine-DNA glycosylase                                         | -1.38 | 0.0541 |
| NTHL1                                   | Nth endonuclease III-like 1 ( <i>E. coli</i> )                         | -1.50 | 0.1470 |
| OGG1                                    | 8-oxoguanine DNA glycosylase                                           | -1.03 | 0.8552 |
| PARP1                                   | Poly (ADP-ribose) polymerase 1                                         | -2.22 | 0.1493 |
| PCNA                                    | Proliferating cell nuclear antigen                                     | -1.69 | 0.2164 |
| TP53                                    | Tumour protein p53                                                     | -2.38 | 0.1091 |
| UNG                                     | Uracil-DNA glycosylase                                                 | -1.69 | 0.1833 |
| XRCC1                                   | X-ray repair complementing defective repair in Chinese hamster cells 1 | -1.45 | 0.2931 |
| <b>Mismatch Repair (NMR)</b>            |                                                                        |       |        |
| ABL1                                    | C-abl oncogene 1, non-receptor tyrosine kinase                         | 1.04  | 0.7511 |
| EXO1                                    | Exonuclease 1                                                          | -1.37 | 0.3610 |
| MLH1                                    | MutL homologue 1, colon cancer, nonpolyposis type 2 ( <i>E. coli</i> ) | -1.97 | 0.0770 |
| MLH3                                    | MutL homologue 3 ( <i>E. coli</i> )                                    | -2.57 | 0.0115 |
| MSH2                                    | MutS homologue 2, colon cancer, nonpolyposis type 1 ( <i>E. coli</i> ) | -2.49 | 0.1088 |
| MSH3                                    | MutS homologue 3 ( <i>E. coli</i> )                                    | -1.15 | 0.5562 |
| PCNA                                    | Proliferating cell nuclear antigen                                     | -1.69 | 0.2164 |
| PMS1                                    | PMS1 postmeiotic segregation increased 1 ( <i>S. cerevisiae</i> )      | -3.95 | 0.0460 |
| PMS2                                    | PMS2 postmeiotic segregation increased 2 ( <i>S. cerevisiae</i> )      | -1.44 | 0.0948 |
| TP73                                    | Tumour protein p73                                                     | -1.84 | 0.2684 |
| <b>Double-Strand Break (DSB) Repair</b> |                                                                        |       |        |
| ATM                                     | Ataxia telangiectasia mutated                                          | -1.83 | 0.2063 |
| BLM                                     | Bloom syndrome, RecQ helicase-like                                     | -3.59 | 0.1165 |
| BRCA1                                   | Breast cancer 1, early onset                                           | -1.92 | 0.2411 |
| CHEK1                                   | CHK1 checkpoint homologue ( <i>S. pombe</i> )                          | -1.38 | 0.4933 |
| H2AFX                                   | H2A histone family, member X                                           | 1.03  | 0.8531 |
| HUS1                                    | HUS1 checkpoint homologue ( <i>S. pombe</i> )                          | -1.52 | 0.1916 |
| LIG1                                    | Ligase I, DNA, ATP-dependent                                           | -1.89 | 0.2830 |
| MDC1                                    | Mediator of DNA-damage checkpoint 1                                    | -1.56 | 0.2740 |
| MLH1                                    | MutL homologue 1, colon cancer, nonpolyposis type 2 ( <i>E. coli</i> ) | -1.97 | 0.0770 |
| MRE11A                                  | MRE11 meiotic recombination 11 homologue A ( <i>S. cerevisiae</i> )    | -1.34 | 0.4849 |
| NBN                                     | Nibrin                                                                 | -1.22 | 0.2421 |

|                               |                                                                        |       |        |
|-------------------------------|------------------------------------------------------------------------|-------|--------|
| PRKDC                         | Protein kinase, DNA-activated, catalytic polypeptide                   | -1.66 | 0.1150 |
| RAD50                         | RAD50 homologue ( <i>S. cerevisiae</i> )                               | -2.12 | 0.1005 |
| RAD51                         | RAD51 homologue ( <i>S. cerevisiae</i> )                               | -1.44 | 0.3643 |
| RPA1                          | Replication protein A1, 70kDa                                          | -2.17 | 0.0614 |
| TP53BP1                       | Tumour protein p53 binding protein 1                                   | -1.05 | 0.7563 |
| XRCC2                         | X-ray repair complementing defective repair in Chinese hamster cells 2 | -3.82 | 0.1453 |
| XRCC6                         | X-ray repair complementing defective repair in Chinese hamster cells 6 | -1.30 | 0.2698 |
| <b>Other DNA Repair Genes</b> |                                                                        |       |        |
| ATR                           | Ataxia telangiectasia and Rad3 related                                 | -2.26 | 0.0531 |
| ATRIP                         | ATR interacting protein                                                | -2.73 | 0.0454 |
| ATRX                          | Alpha thalassaemia/mental retardation syndrome X-linked                | -1.52 | 0.2341 |
| BARD1                         | BRCA1 associated RING domain 1                                         | -3.20 | 0.1430 |
| BRIP1                         | BRCA1 interacting protein C-terminal helicase 1                        | -2.12 | 0.2582 |
| CHEK2                         | CHK2 checkpoint homologue ( <i>S. pombe</i> )                          | -1.14 | 0.6314 |
| CIB1                          | Calcium and integrin binding 1 (calmyrin)                              | -1.15 | 0.4901 |
| CRY1                          | Cryptochrome 1 (photolyase-like)                                       | 2.14  | 0.0496 |
| FANCA                         | Fanconi anaemia, complementation group A                               | -1.09 | 0.7782 |
| FANCD2                        | Fanconi anaemia, complementation group D2                              | -1.33 | 0.4814 |
| FANCG                         | Fanconi anaemia, complementation group G                               | 1.20  | 0.9450 |
| <b>GADD45A</b>                | Growth arrest and DNA-damage-inducible, alpha                          | 4.94  | 0.0020 |
| <b>GADD45G</b>                | Growth arrest and DNA-damage-inducible, gamma                          | 6.64  | 0.0131 |
| RAD1                          | RAD1 homologue ( <i>S. pombe</i> )                                     | 1.07  | 0.8671 |
| RAD17                         | RAD17 homologue ( <i>S. pombe</i> )                                    | -1.83 | 0.0860 |
| RAD18                         | RAD18 homologue ( <i>S. cerevisiae</i> )                               | -2.03 | 0.0659 |
| RAD21                         | RAD21 homologue ( <i>S. pombe</i> )                                    | -1.28 | 0.4098 |
| RAD51B                        | RAD51 homologue B ( <i>S. cerevisiae</i> )                             | 1.14  | 0.7212 |
| RAD9A                         | RAD9 homologue A ( <i>S. pombe</i> )                                   | 1.10  | 0.8714 |
| RBBP8                         | Retinoblastoma binding protein 8                                       | -1.25 | 0.5131 |
| REV1                          | REV1 homologue ( <i>S. cerevisiae</i> )                                | -1.10 | 0.9557 |
| RNF168                        | Ring finger protein 168                                                | 1.88  | 0.0783 |
| RNF8                          | Ring finger protein 8                                                  | 1.23  | 0.3715 |
| SMC1A                         | Structural maintenance of chromosomes 1A                               | -1.07 | 0.6662 |
| SUMO1                         | SMT3 suppressor of Mif Two 3 homologue 1 ( <i>S. cerevisiae</i> )      | 1.00  | 0.9842 |
| TOPBP1                        | Topoisomerase (DNA II) binding protein 1                               | -1.53 | 0.2681 |
| XRCC3                         | X-ray repair complementing defective repair in Chinese hamster cells 3 | -1.76 | 0.3274 |
| <b>Apoptosis</b>              |                                                                        |       |        |
| ATM                           | Ataxia telangiectasia mutated                                          | -1.83 | 0.2063 |
| ABL1                          | C-abl oncogene 1, non-receptor tyrosine kinase                         | 1.04  | 0.7511 |
| ATM                           | Ataxia telangiectasia mutated                                          | -1.83 | 0.2063 |
| BARD1                         | BRCA1 associated RING domain 1                                         | -3.20 | 0.1430 |
| BAX                           | BCL2-associated X protein                                              | -1.28 | 0.2157 |
| <b>BBC3</b>                   | BCL2 binding component 3                                               | 22.23 | 0.0055 |
| BRCA1                         | Breast cancer 1, early onset                                           | -1.92 | 0.2411 |
| CDKN1A                        | Cyclin-dependent kinase inhibitor 1A (p21, Cip1)                       | 7.59  | 0.1030 |

|                   |                                                                       |       |        |
|-------------------|-----------------------------------------------------------------------|-------|--------|
| CHEK2             | CHK2 checkpoint homologue ( <i>S. pombe</i> )                         | -1.14 | 0.6314 |
| CIB1              | Calcium and integrin binding 1 (calmyrin)                             | -1.15 | 0.4901 |
| CSNK2A2           | Casein kinase 2, alpha prime polypeptide                              | 1.47  | 0.1013 |
| <b>PPP1R15A</b>   | Protein phosphatase 1, regulatory (inhibitor) subunit 15A             | 10.19 | 0.0017 |
| PRKDC             | Protein kinase, DNA-activated, catalytic polypeptide                  | -1.66 | 0.1150 |
| RAD21             | RAD21 homologue ( <i>S. pombe</i> )                                   | -1.28 | 0.4098 |
| RAD9A             | RAD9 homologue A ( <i>S. pombe</i> )                                  | 1.10  | 0.8714 |
| SIRT1             | Sirtuin 1                                                             | 4.42  | 0.0645 |
| TP53              | Tumour protein p53                                                    | -2.38 | 0.1091 |
| TP73              | Tumour protein p73                                                    | -1.84 | 0.2684 |
| <b>Cell Cycle</b> |                                                                       |       |        |
| ATM               | Ataxia telangiectasia mutated                                         | -1.83 | 0.2063 |
| ATR               | Ataxia telangiectasia and Rad3 related                                | -2.26 | 0.0531 |
| ATRIP             | ATR interacting protein                                               | -2.73 | 0.0454 |
| CDC25A            | Cell division cycle 25 homologue A ( <i>S. pombe</i> )                | -1.47 | 0.7119 |
| CDC25C            | Cell division cycle 25 homologue C ( <i>S. pombe</i> )                | 1.01  | 0.9110 |
| CDK7              | Cyclin-dependent kinase 7                                             | 1.65  | 0.0120 |
| CDKN1A            | Cyclin-dependent kinase inhibitor 1A (p21, Cip1)                      | 7.59  | 0.1030 |
| CHEK1             | CHK1 checkpoint homologue ( <i>S. pombe</i> )                         | -1.38 | 0.4933 |
| CHEK2             | CHK2 checkpoint homologue ( <i>S. pombe</i> )                         | -1.14 | 0.6314 |
| <b>DDIT3</b>      | DNA-damage-inducible transcript 3                                     | 20.20 | 0.0927 |
| MAPK12            | Mitogen-activated protein kinase 12                                   | -1.31 | 0.3922 |
| MCPH1             | Microcephalin 1                                                       | 1.41  | 0.0537 |
| MDC1              | Mediator of DNA-damage checkpoint 1                                   | -1.56 | 0.2740 |
| PPM1D             | Protein phosphatase, Mg <sup>2+</sup> /Mn <sup>2+</sup> dependent, 1D | 3.94  | 0.1147 |
| <b>PPP1R15A</b>   | Protein phosphatase 1, regulatory (inhibitor) subunit 15A             | 10.19 | 0.0017 |
| TP53              | Tumour protein p53                                                    | -2.38 | 0.1091 |
| TP73              | Tumour protein p73                                                    | -1.84 | 0.2684 |

25  
26  
27  
28

Genes were sorted by Functional Gene Grouping as outlined by the RT<sup>2</sup> Profiler™ PCR Array Human Cancer PathwayFinder™ Kit. Gene expression levels highlighted in boldface were confirmed by real-time qPCR analysis. Tma: tyramine.
